# Supplementary material for: Hydrogen dynamics in soil organic matter as determined by 13 C and 2 H labeling experiments
Source: Copernicus journal article supplement (doi:10.5194/bg-2016-317), 2016-07-28
Supplement: Supplementary file 1 [file bg-2016-317-supplement.pdf]

# Supplementary material

## S1. Incubation characteristics

The isotopic characteristics of the labeling experiment are summarized in the table S1.

Table S1 : Incubation characteristics and the initial isotopic compositions of the labeling experiments.  $^{13}A_m$ ,  $A_m$  and  $A_w$  are respectively the  $^{13}C$  and  $^2H$  abundance of the added labeled source (molecule or water) and  $^{13}A_{tot_i}$ ,  $A_{tot_i}$  are respectively the  $^{13}C$  and  $^2H$  abundance of the total soil at the initial conditions (time 0).

| Experience           | Added molecule | mg   | $^2H_2O$ | $^{13}A_m$ % |        |          | $^{13}A_{tot_i}$ % $\pm$ 0.02 |        |          | $A_m$ or $A_w$ % |        |          | $A_{tot_i}$ % $\pm$ 0.005 |        |          |
|----------------------|----------------|------|----------|--------------|--------|----------|-------------------------------|--------|----------|------------------|--------|----------|---------------------------|--------|----------|
|                      |                |      |          | Cambisol     | Podzol | Leptosol | Cambisol                      | Podzol | Leptosol | Cambisol         | Podzol | Leptosol | Cambisol                  | Podzol | Leptosol |
| $^{13}C^2H + ^1H_2O$ | phenylalanine  | 22.9 | -        | 6.08         | 11.08  | 13.08    | 1.28                          | 1.29   | 1.22     | 2.015            | 2.015  | 3.015    | 0.041                     | 0.052  | 0.026    |
|                      | glucose        | 37.5 | -        | 6.08         | 11.08  | 16.08    | 1.28                          | 1.29   | 1.25     | 2.015            | 2.015  | 3.015    | 0.057                     | 0.076  | 0.033    |
|                      | glucose        | 12.5 | -        | -            | 11.08  | -        | -                             | 1.15   | -        | -                | 3.015  | -        | -                         | 0.046  | -        |
|                      | glucose        | 25   | -        | -            | 6.08   | -        | -                             | 1.15   | -        | -                | 2.015  | -        | -                         | 0.056  | -        |
|                      | isoleucine     | 27.3 | -        | 6.08         | 11.08  | 16.08    | 1.28                          | 1.29   | 1.25     | 2.015            | 2.015  | 3.015    | 0.060                     | 0.080  | 0.035    |
|                      | palmitic acid  | 20   | -        | 6.08         | 11.08  | 16.08    | 1.28                          | 1.29   | 1.25     | 2.015            | 2.015  | 3.015    | 0.057                     | 0.076  | 0.033    |
| $^{13}C^1H + ^2H_2O$ | phenylalanine  | 22.9 | yes      | 6.08         | 11.08  | 16.08    | 1.28                          | 1.29   | 1.22     | 0.28             | 0.46   | 0.27     | 0.284                     | 0.470  | 0.275    |
|                      | glucose        | 37.5 | yes      | 6.08         | 11.08  | 16.08    | 1.28                          | 1.29   | 1.25     | 0.28             | 0.46   | 0.27     | 0.015                     | 0.015  | 0.015    |
|                      | glucose        | 12.5 | yes      | -            | 11.08  | -        | -                             | 1.15   | -        | -                | 0.46   | -        | -                         | 0.015  | -        |
|                      | glucose        | 25   | yes      | -            | 6.08   | -        | -                             | 1.15   | -        | -                | 0.46   | -        | -                         | 0.015  | -        |
|                      | isoleucine     | 27.3 | yes      | 6.08         | 11.08  | 16.08    | 1.28                          | 1.29   | 1.25     | 0.28             | 0.46   | 0.27     | 0.015                     | 0.015  | 0.015    |
|                      | palmitic acid  | 20   | yes      | 6.08         | 11.08  | 16.08    | 1.28                          | 1.29   | 1.25     | 0.28             | 0.46   | 0.27     | 0.015                     | 0.015  | 0.015    |
| Experiment 3         | -              | -    | yes      | -            | -      | -        | 1.08                          | 1.08   | 1.08     | 0.28             | 0.46   | 0.27     | 0.015                     | 0.015  | 0.015    |
| Control              | -              | -    | -        | -            | -      | -        | 1.08                          | 1.08   | 1.08     | -                | -      | -        | 0.015                     | 0.015  | 0.015    |

## S2. Mass balance calculations

All the variables are summarized in the table S2.

### Carbon:

$$C_{\text{tot}} = C_{\text{dfm}} + C_{\text{dfs}} \quad (\text{SI1})$$

$$^{13}\text{A}_{\text{tot}} * C_{\text{tot}} = ^{13}\text{A}_{\text{m}} * C_{\text{dfm}} + ^{13}\text{A}_{\text{tot}_0} * C_{\text{dfs}} \quad (\text{SI2.a})$$

$$^{13}\text{A}_{\text{tot}} * C_{\text{tot}} = ^{13}\text{A}_{\text{m}} * C_{\text{dfm}} + ^{13}\text{A}_{\text{tot}_0} * (C_{\text{tot}} - C_{\text{dfm}}) \quad (\text{SI2.b})$$

from SI1 and SI2 we derive:

$$C_{\text{dfm}} = (^{13}\text{A}_{\text{tot}} - ^{13}\text{A}_{\text{tot}_0}) / (^{13}\text{A}_{\text{m}} - ^{13}\text{A}_{\text{tot}_0}) * C_{\text{tot}} \quad (1)$$

### Hydrogen:

After freeze-drying, hydrogen is considered in three compartments: (i) NEH derived from labeled molecule atoms, (ii) NEH from unlabeled sources, and (iii) exchangeable hydrogen, which is by definition equilibrated with the atmosphere with a given fractionation  $\varepsilon_1$

$$\text{H}_{\text{tot}} = \text{H}_{\text{dfm}} + \text{H}_{\text{dfs}} + \text{H}_{\text{e}} \quad (\text{SI3})$$

$$\text{A}_{\text{tot}} * \text{H}_{\text{tot}} = \text{A}_{\text{m}} * \text{H}_{\text{dfm}} + \text{A}_{\text{dfs}} * \text{H}_{\text{dfs}} + (\text{A}_{\text{atm}} + \varepsilon_1) * \text{H}_{\text{e}} \quad (\text{SI4})$$

from SI3 and SI4 we derive:

$$\text{A}_{\text{tot}} * \text{H}_{\text{tot}} = \text{A}_{\text{m}} * \text{H}_{\text{dfm}} + [\text{A}_{\text{dfs}} * \text{H}_{\text{dfs}} + (\text{A}_{\text{atm}} + \varepsilon_1) * \text{H}_{\text{e}}] / (\text{H}_{\text{dfs}} + \text{H}_{\text{e}}) * (\text{H}_{\text{tot}} - \text{H}_{\text{dfm}}) \quad (\text{SI5})$$

The term  $[\text{A}_{\text{dfs}} * \text{H}_{\text{dfs}} + (\text{A}_{\text{atm}} + \varepsilon_1) * \text{H}_{\text{e}}] / (\text{H}_{\text{dfs}} + \text{H}_{\text{e}})$  is the average composition of unlabeled hydrogen. It is derived from the analysis of the unlabeled sample:

$$\text{H}_{\text{tot}_0} = \text{H}_{\text{dfs}} + \text{H}_{\text{e}} \quad (\text{SI6})$$

$$\text{A}_{\text{tot}_0} = [\text{A}_{\text{dfs}} * \text{H}_{\text{dfs}} + (\text{A}_{\text{atm}} + \varepsilon_1) * \text{H}_{\text{e}}] / (\text{H}_{\text{dfs}} + \text{H}_{\text{e}}) \quad (\text{SI7})$$

from SI5 and SI7 we derive:

$$\text{A}_{\text{tot}} * \text{H}_{\text{tot}} = \text{A}_{\text{m}} * \text{H}_{\text{dfm}} + \text{A}_{\text{tot}_0} * (\text{H}_{\text{tot}} - \text{H}_{\text{dfm}}) \quad (\text{SI8})$$

$$\text{H}_{\text{dfm}} = [(\text{A}_{\text{tot}} - \text{A}_{\text{tot}_0}) / (\text{A}_{\text{m}} - \text{A}_{\text{tot}_0})] * \text{H}_{\text{tot}} \quad (2)$$

By similarity, for Experiment 2 (labeled water), we write:

$$H_{dfw} = (A_{tot} - A_{tot_0}) / (A_w - A_{tot_0}) * H_{tot} \quad (3)$$

These equations are based on approximations: the isotope fractionation term between atmosphere and exchangeable H is supposed to be equal in labeled and unlabeled samples: this is supported by the fact that the amount of exchangeable hydrogen is considered unaffected by the (small) amount of introduced labeled material. The amount of unlabeled HNE ( $H_{dfs}$ ) and its abundance ( $A_{dfs}$ ) are considered equal in the labeled and unlabeled samples. Inequality would affect the denominator in equations (2) and (3). Equality is a numerical approximation without consequence, owing to the very high enrichment of labeled material ( $A_m$ ,  $A_w$ , see table S1).

Table S2: Definition of the variables used for mass balance calculation

|                                              | Variables | Definition                                                        |
|----------------------------------------------|-----------|-------------------------------------------------------------------|
| Quantity<br>(mg g <sup>-1</sup> dry<br>soil) | $C_{tot}$ | Total amount of carbon in the soil                                |
|                                              | $H_{tot}$ | Total amount of hydrogen in the dry soil                          |
|                                              | $C_m$     | Initial amount of carbon in the added molecule                    |
|                                              | $H_m$     | Initial amount of non-exchangeable hydrogen in the added molecule |
|                                              | $H_w$     | Total amount of water hydrogen in the soil                        |
|                                              | $H_e$     | Amount of exchangeable hydrogen in the dry soil                   |
|                                              | $C_{dfs}$ | Amount of unlabeled carbon already present in the soil            |
|                                              | $C_{dfm}$ | Amount of carbon derived from molecule                            |
|                                              | $H_{dfs}$ | Amount of unlabeled non-exchangeable hydrogen present in the soil |
|                                              | $H_{dfw}$ | Amount of non-exchangeable hydrogen derived from water            |
|                                              | $H_{dfm}$ | Amount of non-exchangeable hydrogen derived from molecule         |
|                                              | Abundance | $^{13}A_{tot}$                                                    |
| $A_{tot}$                                    |           | <sup>2</sup> H abundance of the total bulk soil                   |
| $^{13}A_{tot_0}$                             |           | <sup>13</sup> C abundance of the unlabeled experiment (control)   |
| $A_{tot_0}$                                  |           | <sup>2</sup> H abundance of the unlabeled experiment (control)    |
| $^{13}A_m$                                   |           | Initial <sup>13</sup> C abundance of the labeled molecule         |
| $A_m$                                        |           | Initial <sup>2</sup> H abundance of the labeled molecule          |
| $A_w$                                        |           | Initial <sup>2</sup> H abundance of the labeled water             |
| $A_{atm}$                                    |           | <sup>2</sup> H abundance of the atmosphere                        |

### S3. Propagation error calculation

Uncertainties on the element and isotope ratio measurements affect the estimate of the amount of labeled-source derived carbon or hydrogen atoms. To assess the uncertainty  $\sigma_{C_{dfm}}$  (err7),  $\sigma_{H_{dfm}}$  (err8),  $\sigma_{H_{dfw}}$  (err9) or on the calculated values  $C_{dfm}$  (Eq. 6),  $H_{dfm}$  (Eq. 7), and  $H_{dfw}$  (Eq.8) we calculated the statistical error propagation of the uncertainties on measured isotopic compositions and element content of replicated samples presenting in supporting information.

$$\sigma_{C_{dfm}}^2 = (\sigma_{^{13}A_{tot}}^2 + \sigma_{^{13}A_{tot_0}}^2) * [C_{tot} / (A_m - A_{tot_0})]^2 + (\sigma_{^{13}A_m}^2 - \sigma_{^{13}A_{tot_0}}^2) * (A_{tot} - A_{tot_0})^2 * C_{tot}^2 / (A_m - A_{tot_0})^2 + \sigma_{C_{tot}}^2 * [(A_{tot} - A_{tot_0}) / (A_m - A_{tot_0})]^2 \quad (\text{err6})$$

$$\sigma_{H_{dfm}}^2 = (\sigma_{A_{tot}}^2 + \sigma_{A_{tot_0}}^2) * [H_{tot} / (A_m - A_{tot_0})]^2 + (\sigma_{A_m}^2 - \sigma_{A_{tot_0}}^2) * (A_{tot} - A_{tot_0})^2 * H_{tot}^2 / (A_m - A_{tot_0})^2 + \sigma_{H_{tot}}^2 * [(A_{tot} - A_{tot_0}) / (A_m - A_{tot_0})]^2 \quad (\text{err7})$$

$$\sigma_{H_{dfw}}^2 = (\sigma_{A_{tot}}^2 + \sigma_{A_{tot_0}}^2) * [H_{tot} / (A_w - A_{w_0})]^2 + (\sigma_{A_w}^2 - \sigma_{A_{w_0}}^2) * (A_{tot} - A_{tot_0})^2 * H_{tot}^2 / (A_w - A_{w_0})^2 + \sigma_{H_{tot}}^2 * [(A_{tot} - A_{tot_0}) / (A_w - A_{w_0})]^2 \quad (\text{err8})$$

where the indices of the terms  $\sigma_x$  stand for the standard deviation of the respective variable. In this calculation, the uncertainties  $\sigma_{A_m}^2$ ,  $\sigma_{A_w}^2$  and  $\sigma_{^{13}A_m}^2$  were considered as negligible.
